# Supplementary material for: Rapid and sensitive detection of cardiac troponin I using a force enhanced immunoassay with nanoporous membrane
Source: Royal Society of Chemistry journal article supplement (doi:10.1039/d0nr02234a), 2020-01-01
Supplement: d0nr02234a1.pdf [file d0nr02234a1.pdf]

Supplemental Material

Rapid and Sensitive Detection of Cardiac Troponin I using a Nanoporous Membrane  
Enhanced Force Differentiation Assay

*Won-Suk Chang<sup>†,§</sup>, Peng Li<sup>‡</sup>, Sandeep Kakade<sup>†</sup>, Ying Xiong<sup>†</sup>, Hao Shang<sup>†,⊥</sup>, Yong  
Zhang<sup>‡</sup>, and Gil U Lee<sup>†,\*</sup>*

<sup>†</sup> Schools of Chemical and Biomedical Engineering, Forney Hall, Purdue University,  
West Lafayette, IN 47907, USA.

<sup>‡</sup> School of Chemistry and Chemical Biology, University College Dublin, Belfield,  
Dublin 4, Ireland.

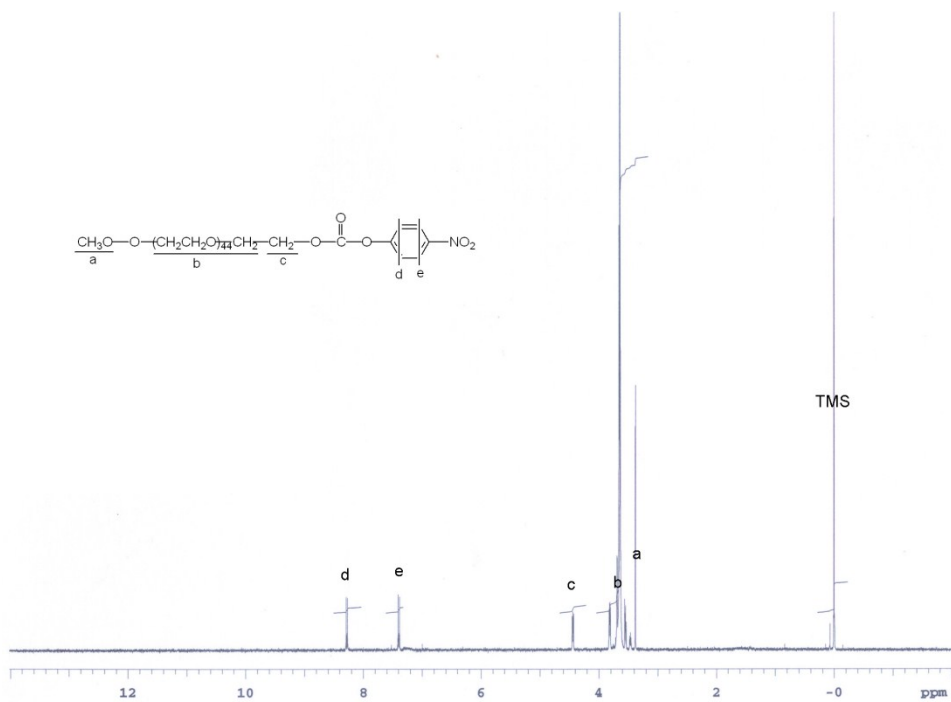

Fig. S1 <sup>1</sup>H-NMR spectrum of 4-NPEG-M (product of the first step)

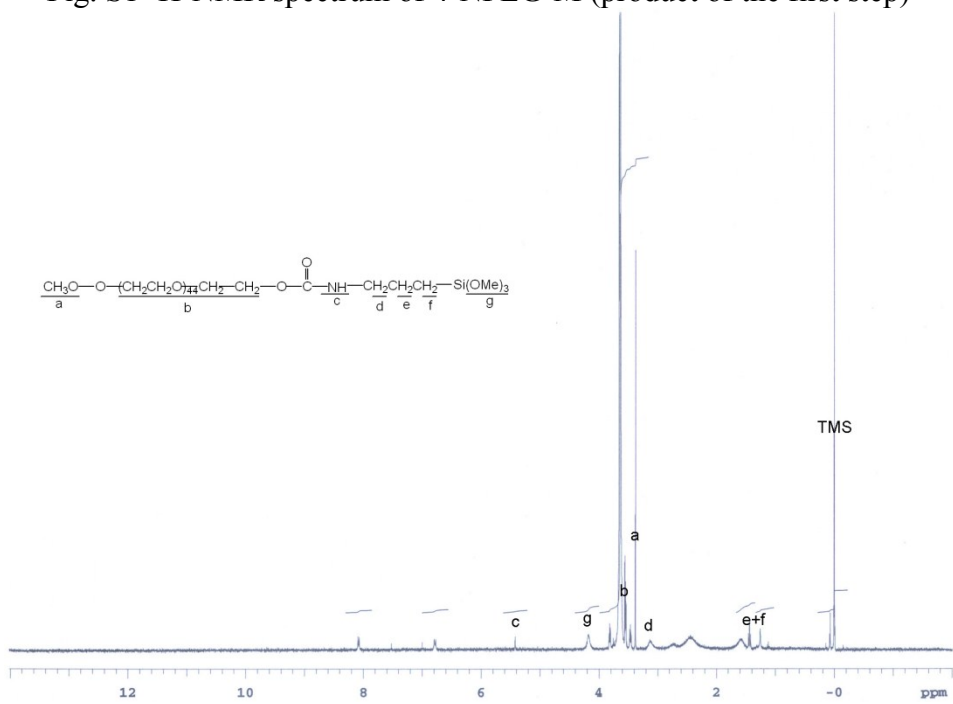

Fig. S2 <sup>1</sup>H-NMR spectrum of M-PEG-silane



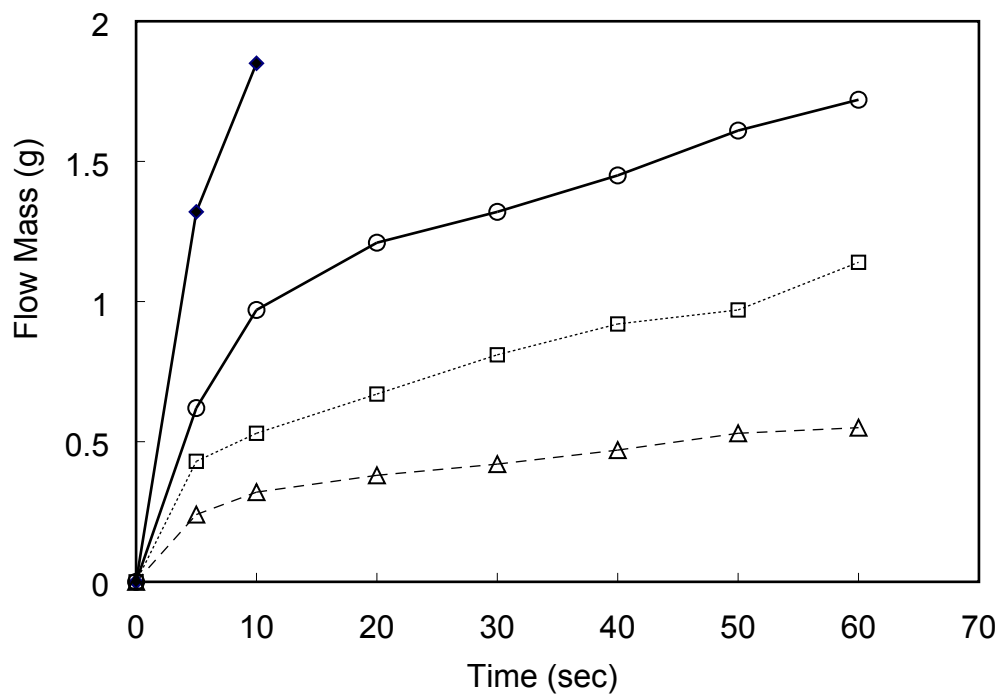

**Fig. S5.** Flow of FCS-PBST solutions across bare 100 nm membranes 10 mm<sup>2</sup> in size at 10 PSIG. Seven measurements are presented: ◆ Pure PBST, ○ 20% FCS in PBST, ◻ 50% FCS in PBST, and ◻ 100% FCS.
